# Supplementary material for: Identification of Hub Genes Associated With Immune Infiltration and Predict Prognosis in Hepatocellular Carcinoma via Bioinformatics Approaches
Source: PubMed Central journal article supplement (PMC7831279; doi:10.3389/fgene.2020.575762), 2021-01-11

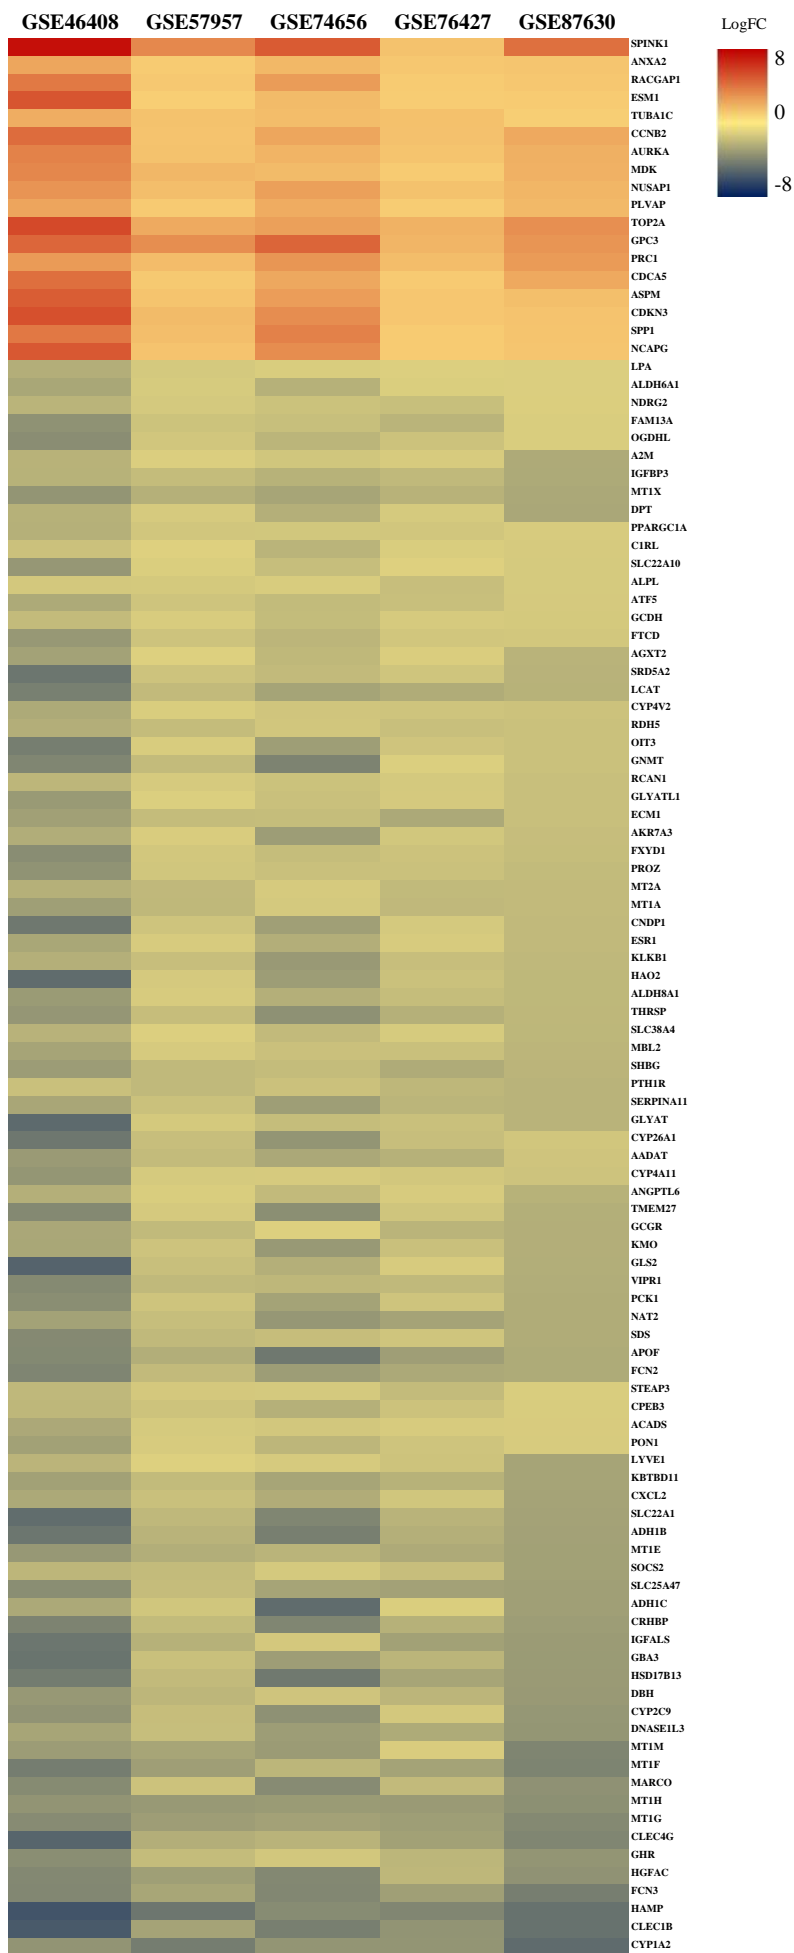

Supplement: Image_1.pdf [file Image_1.pdf]
